1 **RNA degradation heavily impacts**  
2 **mRNA co-expression**

3

4 Óscar García Blay<sup>1,2</sup>, Pieter Verhagen<sup>1,2</sup>, Benjamin Martin<sup>1,3</sup>, Maike M.K. Hansen<sup>1,4\*</sup>

5

6

7 <sup>1</sup> Institute for Molecules and Materials, Radboud University, Heyendaalseweg 135, 6525 AJ  
8 Nijmegen, the Netherlands

9 <sup>2</sup> These authors contributed equally

10 <sup>3</sup> Present address: Institute of Bioengineering, School of Life Sciences, Ecole Polytechnique Fédérale  
11 de Lausanne (EPFL), Lausanne 1015, Switzerland

12 <sup>4</sup> Lead contact

13 \*Correspondence: [maike.hansen@ru.nl](mailto:maike.hansen@ru.nl)

14

15 **KEYWORDS**

16 Co-expression, transcriptome, promoter activity, RNA degradation, single-cell.

17 **SUMMARY**

18 Co-expression of genes measured with single-cell RNA sequencing is extensively utilized to understand  
19 the principles of gene regulation within and across cell types and species. It is assumed that the presence  
20 of correlation in gene expression values at the single-cell level demonstrates the existence of common  
21 regulatory mechanisms. However, the regulatory mechanisms that should lead to observed co-  
22 expression at an mRNA level often remain unexplored. Here we investigate the relationship between  
23 processes upstream and downstream of transcription (i.e., promoter architecture and coordination, DNA  
24 contact frequencies and mRNA degradation) and pairwise gene expression correlations at an mRNA  
25 level. We identify that differences in mRNA degradation (i.e., half-life) is a pivotal source of single-  
26 cell correlations in mRNA levels independently of the presence of common regulatory mechanisms.  
27 These findings reinforce the necessity of including post-transcriptional regulation mechanisms in the  
28 analysis of gene expression in mammalian cells.

29

## 30 INTRODUCTION

31           The emergence of single cell analyses has unlocked an exciting new chapter for understanding  
32 gene regulation in cells. Specifically, single-cell RNA sequencing (scRNA-seq) is a powerful and  
33 widely implemented tool that allows for transcriptome-wide quantification of mRNA in thousands of  
34 individual cells (Hwang et al., 2018). One feature that can be extracted from scRNA-seq datasets is  
35 gene-to-gene co-expression (Eisen et al., 1998), which has been extensively used over the last years in  
36 a range of applications to gain quantitative insights into gene regulation of eukaryotic cells. For  
37 example, co-expression of genes has been described as a robust tool to identify cell types or states from  
38 scRNA-seq datasets (Crow and Gillis, 2018). Specifically, co-expression has been implemented in  
39 order to study cellular heterogeneity of tissues and organs in physiological (Aizarani et al., 2019;  
40 Andrews et al., 2022; Muraro et al., 2016; Payen et al., 2021; Travaglini et al., 2020) and pathological  
41 contexts (Esmaili et al., 2021; Han et al., 2021), as well as dynamic processes such as cell signaling or  
42 changes in cell identity during development (Foreman and Wollman, 2020; Qadir et al., 2020; Salehi et  
43 al., 2021). On the other hand, gene co-expression in scRNA-seq datasets has been exploited to  
44 extrapolate the functional principles of gene expression regulation (Desai et al., 2021) from cellular  
45 populations in the form of gene-regulatory networks (Matsumoto et al., 2017). The most common  
46 approach is the construction and analysis of co-expression networks from pairwise correlation  
47 measurements (Vivian Li and Li, 2021; Wang et al., 2021). Single-cell co-expression network analysis  
48 has thus led to the characterization of novel regulatory pathways (Xie et al., 2021), which in turn has  
49 improved our understanding of common gene regulation principles between cell types and species  
50 (Crow et al., 2022; Harris et al., 2021). Given the expansive application of single-cell co-expression  
51 analysis in both current and likely future studies, it is essential to understand the causality and  
52 limitations of observed correlations in scRNA-seq datasets.

53           In order to exploit co-expression networks to study gene regulation, a common assumption is  
54 that gene-to-gene correlation or anticorrelation indicates an underlying functional relationship (Eisen et  
55 al., 1998; Oliver, 2000). Traditionally, it has been assumed that such co-expression patterns arise from  
56 common regulatory mechanisms that are shared between respective genes. Since gene expression is a

57 multi-step process (e.g., promoter toggling, transcription, RNA processing) (Ronen et al., 2002), there  
58 are different scenarios from which functional (anti)correlation between genes may emerge (Munsky et  
59 al., 2012). For instance, gene-to-gene (anti)correlation could either be caused by shared transcription  
60 factors commonly affecting the transcription of a group of genes, or due to post-transcriptional  
61 processes occurring downstream of transcription (Figure S1A). However, in higher eukaryotes, the  
62 balance between transcriptional and post-transcriptional events underlying mRNA co-expression  
63 remain elusive. Early bulk co-expression experiments have shown that promoter sharing can be a major  
64 source of gene co-expression (Gu et al., 2011). Yet, more recent single cell studies have shown that  
65 shared target-regulator relationships are unlikely to result in co-expression and that most—but definitely  
66 not all—shared transcription factors fail to enforce co-expressed behavior among target genes (Ribeiro  
67 et al., 2021; Yin et al., 2021). Solving the interplay between regulatory architectures and effective co-  
68 expression is key for novel strategies that apply combined approaches to study transcriptional regulation  
69 (Jeong et al., 2021).

70 Here, we sought to identify the parameters that contribute to correlation and anticorrelation in  
71 scRNA-seq data without enforcing previous regulatory structures. To this end, we integrated scRNA-  
72 seq data from mouse embryonic stem cells (mESCs) with other existing datasets from mESCs, including  
73 gene-to-gene contact frequencies in Hi-C data (Nora et al., 2017), promoter activity in intron seq-FISH  
74 data (Shah et al., 2018), and transcript-specific half-life measurements (Sharova et al., 2009). The  
75 analyses show that coordination in promoter activity or gene-to-gene contacts do not appear to be the  
76 major sources of gene-to-gene correlation in RNA expression levels. Remarkably, mRNA degradation  
77 emerges as clear contributor to the (anti)correlations (i.e., co-expression) measured with scRNA-seq.

78

## 79 **RESULTS**

### 80 **Promoter coordination and gene-to-gene contacts do not explain mRNA co-expression**

81 In order to identify possible causes for the (anti)correlation in mRNA levels we integrated several  
82 datasets. To this end, we combined single-cell mRNA abundance data (STAR METHODS) with 3

83 additional published datasets providing promoter activity information (Shah et al., 2018), gene-to-gene  
84 contact frequencies (Nora et al., 2017), and mRNA half-lives (Sharova et al., 2009) (Figure 1A and 1B),  
85 all 4 datasets from mESCs. In order to accurately compare all data modalities, we limited the number  
86 of genes analyzed to those included in all datasets, totaling 5277 genes. To extract (anti)correlation  
87 regimes we first performed gene-by-gene pairwise Pearson correlation analysis from scaled scRNA-seq  
88 read counts, followed by hierarchical clustering (Figure 1A). Pearson correlation is preferred over  
89 Spearman because highly expressed genes in a low number of cells display more accurate Pearson  
90 correlation values than Spearman correlation values (Figure S1B and S1C), as described in other studies  
91 (Vandenbon, 2022). To incorporate the promoter behavior of each gene into our analysis, we assumed  
92 two-state promoter toggling as an underlying mechanistic model for the analyzed promoters (Esmaili  
93 et al., 2021; Kepler and Elston, 2001; Raj et al., 2006; Weinberger et al., 2005). Eukaryotic promoters  
94 have been described to switch between at least two (Harper et al., 2011; Zenklusen et al., 2008) distinct  
95 states: one state that allows for mRNA production (referred to as the ON state) and another state that is  
96 not permissive for mRNA production (referred to as the OFF state). This toggling results in the  
97 discontinuous or bursty behavior that is associated with transcription in eukaryotes (Chong et al., 2014;  
98 Coulon et al., 2013; Golding et al., 2005; Suter et al., 2011). The effective ON and OFF states of each  
99 promoter can be defined by the presence or absence of intronic signal respectively (Bahar Halpern et  
100 al., 2015; Shah et al., 2018). With this information, we computed the likelihood that pairwise promoters  
101 are more coordinated (i.e., ON or OFF at the same time) or anti-coordinated (i.e., one promoter being  
102 ON while the other is OFF and *vice versa*) compared to what is expected from independent random  
103 promoter behavior (Figure 1A and 1B, green and purple respectively).

104 To determine if mRNA correlation behavior (i.e., mRNA co-expression) originates at the promoter, we  
105 integrated the pairwise matrix of promoter coordination with the Pearson correlation matrix from the  
106 scRNA-seq dataset (Figure 1A and 1B, top). Surprisingly, the integrated matrices did not show any  
107 clear structure in the (anti-)coordination matrix when ranked according to the scRNA-seq  $r$  coefficient  
108 clustering, likely because promoter (anti-)coordination only deviated minimally from independent  
109 promoter behavior (Figure S1D). In order to gain deeper insights into the relationship of these two

110 features that could be hidden in the visual representation of the data, we performed a quantitative  
111 analysis of 4 distinct correlation regimes with decreasing average co-expression values (Figure 1C): i)  
112 a small 387 by 387 gene cluster showing the highest and lowest values for positive and negative  
113 correlation respectively (Figure 1B and 1C, regime I); ii) an expanded regime including regime I in  
114 addition to a distant cluster with relatively high correlation values and all pairwise comparisons between  
115 these two clusters (Figure 1A and 1C, regime II); iii) the full 5277 by 5277 gene dataset (Figure 1A and  
116 C, regime III); iv) the central 4224 by 4226 gene regime where Pearson coefficients were close to 0  
117 (Figure 1A, regime IV). Per regime (I-IV) we performed sub-sampling (see STAR Methods for more  
118 detail) and plotted the relationship between mRNA co-expression (i.e., scRNA-seq  $r$ ) and promoter  
119 coordination (Figure 1D) and quantified the relationship by calculating Pearson's correlation  $r$  as a  
120 proxy for the relationship strength (Figure 1D and 1E). The analysis showed a subtle positive  
121 association between promoter coordination and mRNA co-expression in regimes II and III (Figure 1E,  
122 red). Together, these data indicate that promoter coordination or anti-coordination does not generate a  
123 respective positive or negative correlation at an mRNA level.

124 To identify any hidden coregulation at a DNA level that was not captured by our promoter coordination  
125 analysis, we sought to discern if DNA contact frequencies were higher in gene clusters that are more  
126 (anti)correlated at an mRNA level (de Wit, 2020; Soler-Oliva et al., 2017). To this end, the same  
127 integration process (Figure S1E) and binned correlation analysis (Figure S1F and S1G) as for promoter  
128 coordination (Figure 1A-B and 1C-E respectively) was performed with Hi-C based DNA contact  
129 frequencies from a previously published dataset (Nora et al., 2017). Hi-C contact frequencies did not  
130 show any clear structure when plotted with respect to RNA co-expression (Figure S1E), nor did detailed  
131 quantitative analysis reveal a clear correlation between the Hi-C contact frequencies and mRNA co-  
132 expression (Figure S1F and S1G).

133

134 **mRNA half-life differences contribute to mRNA co-expression**

135 Since neither promoter coordination nor DNA contact frequencies underlie mRNA co-expression  
136 behavior (Figure 1 and Figure S1), we considered whether differences in gene-specific kinetic  
137 parameters could be causing mRNA co-expression. From the intron seq-FISH dataset (Shah et al.,  
138 2018), we obtained the fraction of cells that are present in the ON state (i.e.,  $f_{on}$ ) for each gene, which,  
139 assuming ergodicity coincides with the fraction of time a promoter is active (Dattani and Barahona,  
140 2017; Desai et al., 2021). Numerically,  $f_{on}$  is a function of toggling rates—i.e.,  $f_{on} = K_{ON}/[K_{ON}+K_{OFF}]$ .  
141 On average, each promoter is on 12.5% of the time (i.e.,  $f_{on} = 0.125$ ), and each cell is expressing  
142 approximately 8% of the ~10,000 genes analyzed at a given moment in time as previously described  
143 (Shah et al., 2018). The data (Shah et al., 2018) represents a population of cells where every cell has  
144 approximately the same number of genes active at a given timepoint, and the average promoter is in a  
145 bursty toggling regime (Munsky et al., 2012), where  $K_{ON} < K_{OFF}$  (on average  $K_{OFF} \approx 7xK_{ON}$ ). These  
146 promoter toggling frequencies are in line with previous observations (Bahar Halpern et al., 2015;  
147 Hansen et al., 2018). To expand our analysis to post-transcriptional kinetic parameters, we included  
148 the half-life of each transcript ( $t_{1/2}$ ) from a third published dataset (Sharova et al., 2009).

149 First, in order to verify that these three separate datasets (mRNA co-expression,  $f_{on}$ , and  $t_{1/2}$ ) could  
150 indeed be accurately compared, we determined if the relationship between mRNA expression, promoter  
151 toggling, and mRNA degradation behaved as expected. Overall, the fraction of time the promoter is in  
152 the ON state ( $f_{on}$ ) followed a similar trend as the mean mRNA abundance. This is especially evident  
153 when considering the trend across all ~5000 genes (Figure 1A, blue and red respectively). This is  
154 expected, since the mean mRNA abundance ( $\mu$ ) is proportional to the time a promoter spends in the ON  
155 state ( $\mu \propto f_{on} \cdot k_{tx}$ ; where  $k_{tx}$  is the transcription rate) (Munsky et al., 2012). We next quantified the  
156 strength of the association between mean mRNA abundance and the fraction of time a promoter spends  
157 in the ON state (Figure 2A) or mRNA half-life (Figure 2B) as a function of mean expression. At low  
158 mRNA expression there is a strong positive association between mean mRNA abundance and the  
159 fraction of time a promoter spends in the ON state ( $f_{on}$ ). This association exhibits an overall decrease  
160 with increased mRNA expression levels. In other words, for genes with higher mRNA abundance,  
161 mean mRNA expression displays a much weaker association with promoter toggling frequencies than

162 for genes with low mRNA abundance, indicating that other processes play a more dominant role.  
163 Interestingly, genes that show a decreased association between the fraction of time a promoter spends  
164 in the ON state ( $f_{on}$ ) and mean mRNA abundance, show a corresponding increase in association of  
165 mRNA half-life ( $t_{1/2}$ ) with mean mRNA abundance (Figure 2A and 2B, grey shaded area). This is in  
166 accordance with what is expected from the relationship of mean mRNA abundance, promoter toggling  
167 and mRNA degradation (Figure S2A) (Hansen et al., 2018; Munsky et al., 2012). Furthermore, the  
168 time a promoter spends in the ON state ( $f_{on}$ ) follows a similar trend as noise ( $\sigma_{res}^2$ , equivalent to the  
169 Fano factor, see STAR Methods for more details), which is most apparent when considering the inset  
170 of ~900 genes (Figure 1B, blue and orange respectively). We therefore quantified the strength of  
171 association between mRNA noise and the fraction of time a promoter spends in the ON state (Figure  
172 S2B). As expected from known dependence of noise on promoter toggling rates (Dar et al., 2012),  
173 mRNA noise is strongly associated with the fraction of time the respective promoter spends in the ON  
174 state (Figure S2A and S2B) with this association becoming stronger at higher mean mRNA abundances.  
175 Taken together, these results demonstrate that data obtained from different studies can reliably be  
176 compared, and relationships quantified.

177 To identify if pairwise differences in promoter toggling kinetics ( $f_{on}$ ) or mRNA half-lives ( $t_{1/2}$ ) underlie  
178 co-expression of genes at an mRNA level, we followed the same workflow as in Figure 1 and Figure  
179 S1. We performed random subsampling of regimes I-IV (Figure 1C), and plotted the relationship  
180 between pairwise mRNA co-expression (i.e., scRNA-seq  $r$ ) and either the pairwise difference in mRNA  
181 half-life (Figure 2C and 2D) or the pairwise difference in the ON-fraction of the respective promoters  
182 (Figure 2E and 2F). In the regime with the highest mRNA co-expression (i.e., most positive and most  
183 negative scRNA-seq  $r$  values, regime I), both the promoter toggling and the mRNA half-life differences  
184 have a strong relationship with mRNA co-expression (Figure 2C and E). Nevertheless, this relationship  
185 becomes less prominent for promoter toggling when we sample regimes with more subtle mRNA co-  
186 expression at an mRNA level (Figure 2F, S2E and S2F). Conversely, pairwise differences in mRNA  
187 half-lives remain more strongly associated with mRNA co-expression even at lower co-expression  
188 levels (Figure 2D, S2C, and S2D). Together, these data show that mRNA degradation is coupled to



189 both positive and negative co-expression across all ~5000 genes analyzed, where similar half-lives are  
190 associated with positive co-expression, while different half-lives are associated with negative co-  
191 expression of two genes (Figure 2I).

## 192 **mRNA half-life and promoter toggling demonstrate compensatory behavior**

193 The finding that both pairwise differences in promoter toggling as well as mRNA half-life are associated  
194 with mRNA co-expression for a small subset (<10%) of genes (Figure 2C and E), and seem to have an  
195 inverse effect on mean mRNA abundance (Figure 2A and 2B), led us to question the relationship  
196 between promoter toggling and mRNA half-life. Therefore, we quantified both the absolute and  
197 directional pairwise differences in half-life and promoter toggling (Figure 2G and S2G, see STAR  
198 Methods for details). In the regime with the highest co-expression values (regime I), there is a strong  
199 positive correlation between absolute differences in promoter toggling and mRNA half-life (Figure 2G  
200 and S2G, top). This means that gene-pairs with a large difference in promoter toggling kinetics, also  
201 display a large difference in mRNA half-life. Across all sampled regimes (I-IV) half-life and promoter  
202 toggling showed compensatory (i.e., genes with higher  $f_{on}$  have lower  $t_{1/2}$ ) rather than synergistic (i.e.,  
203 the groups of genes with a higher  $f_{on}$  also demonstrate a higher  $t_{1/2}$ ) behavior (Figure 2G and S2G,  
204 bottom). Intuitively, this compensation can be explained by the inherent relationship between promoter  
205 toggling and mRNA half-life ( $\mu = f_{on} \cdot k_{tx} / k_d$ , where  $k_d$  is mRNA degradation rate). Therefore, at similar  
206 mean mRNA expression levels we expect mRNA half-life to be inversely proportional to promoter  
207 toggling (Figure S2H). This relationship between two seemingly distal kinetic parameters emphasizes  
208 the balance between transcriptional and post-transcriptional processes that together orchestrate the gene  
209 expression landscapes, to the extent that the one cannot be understood without the other.

## 210 **DISCUSSION**

211 In this brief report we integrated gene co-expression data from scRNA-seq analysis with other data  
212 modalities (Nora et al., 2017; Shah et al., 2018; Sharova et al., 2009) that provide context from various  
213 processes involved in gene expression to assess whether specific kinetic steps influence scRNA-seq  
214 data. Our goal was to interrogate the relationships between the observed correlations in single-cell

215 mRNA levels and the processes upstream and downstream of transcription without assuming specific  
216 regulatory architectures. The analysis showed that promoter coordination was not playing a discernible  
217 role in gene co-expression especially when (anti)correlation of mRNA is the strongest (Figure 1). Yet,  
218 it is important to note that promoter behavior might not be properly captured by a single snapshot, as  
219 promoter coordination could emerge from more complex temporal dynamics where promoters are, for  
220 example, likely to be ON in close temporal proximity but not necessarily at the same time.  
221 Unfortunately, the techniques for assessing promoter activity with temporal resolution (e.g. MS2  
222 tagging) are limited to lower throughput applications (Hocine et al., 2013; Wan et al., 2021) and require  
223 genetic modification, as a specific sequence has to be added to a gene for the mRNA to be tracked  
224 (Tantale et al., 2016).

225 We next included other kinetic parameters in the analysis. Strikingly, mRNA half-life  
226 demonstrated a strong negative association with scRNA-seq co-expression  $r$  values (Figure 2).  
227 Additionally, for specific regimes of very evident (anti)correlation in mRNA levels, differences in  
228 promoter ON ratio also seemed to play an important role. In fact, in these regions the differences in  $f_{on}$   
229 and half-life demonstrate clear compensatory behavior. It is possible that there is a mechanistic reason  
230 why this occurs — i.e., is it a requirement for genes to have extreme correlation values to show this  
231 specific behavior — or that this relationship is an evolutionary consequence. Many elegant studies on  
232 gene expression regulation focus on chromatin and transcriptional events (Larson et al., 2013; Lenstra  
233 et al., 2016; Zinani et al., 2022), and downstream processes should not be underestimated. This work  
234 together with other recent publications (Aizarani et al., 2019; Gilbertson et al., 2018; Hansen et al.,  
235 2018; Hansen and Weinberger, 2019; Matkovic et al., 2022) is enforcing the necessity of including  
236 post-transcriptional events.

237

238 **ACKNOWLEDGEMENTS:**

239 We thank all members of the Hansen lab for the thoughtful discussion and suggestions. We also thank  
240 Hendrik Marks for his generous gift of mESC-E14 cell line. M.M.K.H. acknowledges support from the  
241 Dutch Research Council (NWO) ENW-XS awards (OCENW.XS3.055 and OCENW.XS21.2.050).

242 **AUTHOR CONTRIBUTIONS:**

243 Ó.G.B. and M.M.K.H. conceived the study. Ó.G.B., P.V., B.M, and M.M.K.H. designed the study.  
244 Ó.G.B. performed single-cell RNA-seq experiments. Ó.G.B., P.V., and M.M.K.H. designed and  
245 performed the data analyses. Ó.G.B. and M.M.K.H. wrote and P.V. and B.M. edited the manuscript

246 **DECLARATION OF INTERESTS:** Authors declare no competing interests.

247 **DATA AND MATERIALS AVAILABILITY:** Sequencing data from single-cell RNA-seq will be  
248 deposited onto GEO. Custom code for analysis of sequencing data and mathematical modeling will be  
249 made available on GitHub.

250 **References:**

- 251 Aizarani, N., Saviano, A., Sagar, Maily, L., Durand, S., Herman, J.S., Pessaux, P., Baumert, T.F., and  
252 Grun, D. (2019). A human liver cell atlas reveals heterogeneity and epithelial progenitors. *Nature* 572,  
253 199-204.
- 254 Andrews, T.S., Atif, J., Liu, J.C., Perciani, C.T., Ma, X.Z., Thoeni, C., Slyper, M., Eraslan, G.,  
255 Segerstolpe, A., Manuel, J., *et al.* (2022). Single-Cell, Single-Nucleus, and Spatial RNA Sequencing of  
256 the Human Liver Identifies Cholangiocyte and Mesenchymal Heterogeneity. *Hepatol Commun* 6, 821-  
257 840.
- 258 Bahar Halpern, K., Tanami, S., Landen, S., Chapal, M., Szlak, L., Hutzler, A., Nizhberg, A., and  
259 Itzkovitz, S. (2015). Bursty gene expression in the intact mammalian liver. *Mol Cell* 58, 147-156.
- 260 Chong, S., Chen, C., Ge, H., and Xie, X.S. (2014). Mechanism of transcriptional bursting in bacteria.  
261 *Cell* 158, 314-326.
- 262 Coulon, A., Chow, C.C., Singer, R.H., and Larson, D.R. (2013). Eukaryotic transcriptional dynamics:  
263 from single molecules to cell populations. *Nat Rev Genet* 14, 572-584.
- 264 Crow, M., and Gillis, J. (2018). Co-expression in Single-Cell Analysis: Saving Grace or Original Sin?  
265 *Trends Genet* 34, 823-831.
- 266 Crow, M., Suresh, H., Lee, J., and Gillis, J. (2022). Coexpression reveals conserved gene programs that  
267 co-vary with cell type across kingdoms. *Nucleic Acids Res.*
- 268 Dar, R.D., Razooky, B.S., Singh, A., Trimeloni, T.V., McCollum, J.M., Cox, C.D., Simpson, M.L., and  
269 Weinberger, L.S. (2012). Transcriptional burst frequency and burst size are equally modulated across  
270 the human genome. *Proc Natl Acad Sci U S A* 109, 17454-17459.
- 271 Dattani, J., and Barahona, M. (2017). Stochastic models of gene transcription with upstream drives:  
272 exact solution and sample path characterization. *J R Soc Interface* 14.
- 273 de Wit, E. (2020). TADs as the Caller Calls Them. *J Mol Biol* 432, 638-642.
- 274 Desai, R.V., Chen, X., Martin, B., Chaturvedi, S., Hwang, D.W., Li, W., Yu, C., Ding, S., Thomson,  
275 M., Singer, R.H., *et al.* (2021). A DNA repair pathway can regulate transcriptional noise to promote  
276 cell fate transitions. *Science* 373, eabc6506.
- 277 Eisen, M.B., Spellman, P.T., Brown, P.O., and Botstein, D. (1998). Cluster analysis and display of  
278 genome-wide expression patterns. *Proc Natl Acad Sci* 95, 14863-14868.
- 279 Esmaili, S., Langfelder, P., Belgard, T.G., Vitale, D., Azardaryany, M.K., Alipour Talesh, G.,  
280 Ramezani-Moghadam, M., Ho, V., Dvorkin, D., Dervish, S., *et al.* (2021). Core liver homeostatic co-  
281 expression networks are preserved but respond to perturbations in an organism- and disease-specific  
282 manner. *Cell Syst* 12, 432-445 e437.
- 283 Foreman, R., and Wollman, R. (2020). Mammalian gene expression variability is explained by  
284 underlying cell state. *Molecular Systems Biology* 16, e9146.
- 285 Gilbertson, S., Federspiel, J.D., Hartenian, E., Cristea, I.M., and Glaunsinger, B. (2018). Changes in  
286 mRNA abundance drive shuttling of RNA binding proteins, linking cytoplasmic RNA degradation to  
287 transcription. *Elife* 7.
- 288 Golding, I., Paulsson, J., Zawilski, S.M., and Cox, E.C. (2005). Real-time kinetics of gene activity in  
289 individual bacteria. *Cell* 123, 1025-1036.

- 290 Gu, Q., Nagaraj, S.H., Hudson, N.J., Dalrymple, B.P., and Reverter, A. (2011). Genome-wide patterns  
291 of promoter sharing and co-expression in bovine skeletal muscle. *BMC Genomics* *12*, 23.
- 292 Hafemeister, C., and Satija, R. (2019). Normalization and variance stabilization of single-cell RNA-seq  
293 data using regularized negative binomial regression. *Genome Biol* *20*, 296.
- 294 Han, J., DePinho, R.A., and Maitra, A. (2021). Single-cell RNA sequencing in pancreatic cancer. *Nat*  
295 *Rev Gastroenterol Hepatol* *18*, 451-452.
- 296 Hansen, M.M.K., Desai, R.V., Simpson, M.L., and Weinberger, L.S. (2018). Cytoplasmic  
297 Amplification of Transcriptional Noise Generates Substantial Cell-to-Cell Variability. *Cell Syst* *7*, 384-  
298 397 e386.
- 299 Hansen, M.M.K., and Weinberger, L.S. (2019). Post-Transcriptional Noise Control. *Bioessays* *41*,  
300 e1900044.
- 301 Harper, C.V., Finkenstadt, B., Woodcock, D.J., Friedrichsen, S., Semprini, S., Ashall, L., Spiller, D.G.,  
302 Mullins, J.J., Rand, D.A., Davis, J.R., *et al.* (2011). Dynamic analysis of stochastic transcription cycles.  
303 *PLoS Biol* *9*, e1000607.
- 304 Harris, B.D., Crow, M., Fischer, S., and Gillis, J. (2021). Single-cell co-expression analysis reveals that  
305 transcriptional modules are shared across cell types in the brain. *Cell Syst* *12*, 748-756 e743.
- 306 Hocine, S., Raymond, P., Zenklusen, D., Chao, J.A., and Singer, R.H. (2013). Single-molecule analysis  
307 of gene expression using two-color RNA labeling in live yeast. *Nat Methods* *10*, 119-121.
- 308 Hwang, B., Lee, J.H., and Bang, D. (2018). Single-cell RNA sequencing technologies and  
309 bioinformatics pipelines. *Experimental & Molecular Medicine* *50*, 1-14.
- 310 Jeong, D., Lim, S., Lee, S., Oh, M., Cho, C., Seong, H., Jung, W., and Kim, S. (2021). Construction of  
311 Condition-Specific Gene Regulatory Network Using Kernel Canonical Correlation Analysis. *Front*  
312 *Genet* *12*, 652623.
- 313 Kepler, T.B., and Elston, T.C. (2001). Stochasticity in transcriptional regulation: origins, consequences,  
314 and mathematical representations. *Biophys J* *81*, 3116-3136.
- 315 Kowalczyk, M.S., Tirosh, I., Heckl, D., Rao, T.N., Dixit, A., Haas, B.J., Schneider, R.K., Wagers, A.J.,  
316 Ebert, B.L., and Regev, A. (2015). Single-cell RNA-seq reveals changes in cell cycle and differentiation  
317 programs upon aging of hematopoietic stem cells. *Genome Res* *25*, 1860-1872.
- 318 Larson, D.R., Fritsch, C., Sun, L., Meng, X., Lawrence, D.S., and Singer, R.H. (2013). Direct  
319 observation of frequency modulated transcription in single cells using light activation. *Elife* *2*, e00750.
- 320 Lause, J., Berens, P., and Kobak, D. (2021). Analytic Pearson residuals for normalization of single-cell  
321 RNA-seq UMI data. *Genome Biol* *22*, 258.
- 322 Lenstra, T.L., Rodriguez, J., Chen, H., and Larson, D.R. (2016). Transcription Dynamics in Living  
323 Cells. *Annu Rev Biophys* *45*, 25-47.
- 324 Matkovic, R., Morel, M., Lanciano, S., Larrous, P., Martin, B., Bejjani, F., Vauthier, V., Hansen,  
325 M.M.K., Emiliani, S., Cristofari, G., *et al.* (2022). TASOR epigenetic repressor cooperates with a  
326 CNOT1 RNA degradation pathway to repress HIV. *Nature Communications* *13*, 66.

- 327 Matsumoto, H., Kiryu, H., Furusawa, C., Ko, M.S.H., Ko, S.B.H., Gouda, N., Hayashi, T., and Nikaido,  
328 I. (2017). SCODE: an efficient regulatory network inference algorithm from single-cell RNA-Seq  
329 during differentiation. *Bioinformatics* 33, 2314-2321.
- 330 Munsky, B., Neuert, G., and van Oudenaarden, A. (2012). Using Gene Expression Noise to Understand  
331 Gene Regulation. *Science* 336, 183-187.
- 332 Muraro, M.J., Dharmadhikari, G., Grün, D., Groen, N., Dielen, T., Jansen, E., van Gorp, L., Engelse,  
333 M.A., Carlotti, F., de Koning, E.J., *et al.* (2016). A Single-Cell Transcriptome Atlas of the Human  
334 Pancreas. *Cell Syst* 3, 385-394.e383.
- 335 Nora, E.P., Goloborodko, A., Valton, A.-L., Gibcus, J.H., Uebersohn, A., Abdennur, N., Dekker, J.,  
336 Mirny, L.A., and Bruneau, B.G. (2017). Targeted Degradation of CTCF Decouples Local Insulation of  
337 Chromosome Domains from Genomic Compartmentalization. *Cell* 169, 930-944.e922.
- 338 Oliver, S. (2000). Guilt-by-association goes global. *Nature* 403, 601-602.
- 339 Payen, V.L., Lavergne, A., Alevra Sarika, N., Colonval, M., Karim, L., Deckers, M., Najimi, M.,  
340 Coppieters, W., Charlotheaux, B., Sokal, E.M., *et al.* (2021). Single-cell RNA sequencing of human liver  
341 reveals hepatic stellate cell heterogeneity. *JHEP Rep* 3, 100278.
- 342 Qadir, M.M.F., Alvarez-Cubela, S., Klein, D., van Dijk, J., Muniz-Anquela, R., Moreno-Hernandez,  
343 Y.B., Lanzoni, G., Sadiq, S., Navarro-Rubio, B., Garcia, M.T., *et al.* (2020). Single-cell resolution  
344 analysis of the human pancreatic ductal progenitor cell niche. *Proc Natl Acad Sci U S A* 117, 10876-  
345 10887.
- 346 Raj, A., Peskin, C.S., Tranchina, D., Vargas, D.Y., and Tyagi, S. (2006). Stochastic mRNA synthesis  
347 in mammalian cells. *PLoS Biol* 4, e309.
- 348 Ribeiro, D.M., Ziyani, C., and Delaneau, O. (2021). Shared regulation and functional relevance of local  
349 gene co-expression revealed by single cell analysis  
350 . bioRxiv.
- 351 Ronen, M., Rosenberg, R., Shraiman, B.I., and Alon, U. (2002). Assigning numbers to the arrows:  
352 parameterizing a gene regulation network by using accurate expression kinetics. *Proc Natl Acad Sci U*  
353 *S A* 99, 10555-10560.
- 354 Salehi, N., Karimi-Jafari, M.H., Totonchi, M., and Amiri-Yekta, A. (2021). Integration and gene co-  
355 expression network analysis of scRNA-seq transcriptomes reveal heterogeneity and key functional  
356 genes in human spermatogenesis. *Sci Rep* 11, 19089.
- 357 Shah, S., Takei, Y., Zhou, W., Lubeck, E., Yun, J., Eng, C.L., Koulona, N., Cronin, C., Karp, C., Liaw,  
358 E.J., *et al.* (2018). Dynamics and Spatial Genomics of the Nascent Transcriptome by Intron seqFISH.  
359 *Cell* 174, 363-376 e316.
- 360 Sharova, L.V., Sharov, A.A., Nedorezov, T., Piao, Y., Shaik, N., and Ko, M.S. (2009). Database for  
361 mRNA half-life of 19 977 genes obtained by DNA microarray analysis of pluripotent and differentiating  
362 mouse embryonic stem cells. *DNA Res* 16, 45-58.
- 363 Soler-Oliva, M.E., Guerrero-Martinez, J.A., Bachetti, V., and Reyes, J.C. (2017). Analysis of the  
364 relationship between coexpression domains and chromatin 3D organization. *PLoS Comput Biol* 13,  
365 e1005708.

- 366 Stuart, T., Butler, A., Hoffman, P., Hafemeister, C., Papalexi, E., Mauck, W.M., 3rd, Hao, Y., Stoeckius,  
367 M., Smibert, P., and Satija, R. (2019). Comprehensive Integration of Single-Cell Data. *Cell* *177*, 1888-  
368 1902 e1821.
- 369 Suter, D.M., Molina, N., Gatfield, D., Schneider, K., Schibler, U., and Naef, F. (2011). Mammalian  
370 Genes Are Transcribed with Widely Different Bursting Kinetics. *Science* *332*, 472-474.
- 371 Tantale, K., Mueller, F., Kozulic-Pirher, A., Lesne, A., Victor, J.-M., Robert, M.-C., Capozzi, S.,  
372 Chouaib, R., Bäcker, V., Mateos-Langerak, J., *et al.* (2016). A single-molecule view of transcription  
373 reveals convoys of RNA polymerases and multi-scale bursting. *Nature Communications* *7*, 12248.
- 374 Travaglini, K.J., Nabhan, A.N., Penland, L., Sinha, R., Gillich, A., Sit, R.V., Chang, S., Conley, S.D.,  
375 Mori, Y., Seita, J., *et al.* (2020). A molecular cell atlas of the human lung from single-cell RNA  
376 sequencing. *Nature* *587*, 619-625.
- 377 Vandebon, A. (2022). Evaluation of critical data processing steps for reliable prediction of gene co-  
378 expression from large collections of RNA-seq data. *PLoS One* *17*, e0263344.
- 379 Vivian Li, W., and Li, Y. (2021). scLink: Inferring Sparse Gene Co-expression Networks from Single-  
380 cell Expression Data. *Genomics Proteomics Bioinformatics* *19*, 475-492.
- 381 Wan, Y., Anastasakis, D.G., Rodriguez, J., Palangat, M., Gudla, P., Zaki, G., Tandon, M., Pegoraro,  
382 G., Chow, C.C., Hafner, M., *et al.* (2021). Dynamic imaging of nascent RNA reveals general principles  
383 of transcription dynamics and stochastic splice site selection. *Cell* *184*, 2878-2895.e2820.
- 384 Wang, X., Choi, D., and Roeder, K. (2021). Constructing local cell-specific networks from single-cell  
385 data. *Proc Natl Acad Sci U S A* *118*.
- 386 Weinberger, L.S., Burnett, J.C., Toettcher, J.E., Arkin, A.P., and Schaffer, D.V. (2005). Stochastic gene  
387 expression in a lentiviral positive-feedback loop: HIV-1 Tat fluctuations drive phenotypic diversity.  
388 *Cell* *122*, 169-182.
- 389 Xie, J., Chen, L., Cao, Y., Wu, D., Xiong, W., Zhang, K., Shi, J., and Wang, M. (2021). Single-Cell  
390 Sequencing Analysis and Weighted Co-Expression Network Analysis Based on Public Databases  
391 Identified That TNC Is a Novel Biomarker for Keloid. *Front Immunol* *12*, 783907.
- 392 Yin, W., Mendoza, L., Monzon-Sandoval, J., Urrutia, A.O., and Gutierrez, H. (2021). Emergence of  
393 co-expression in gene regulatory networks. *PLoS One* *16*, e0247671.
- 394 Zenklusen, D., Larson, D.R., and Singer, R.H. (2008). Single-RNA counting reveals alternative modes  
395 of gene expression in yeast. *Nat Struct Mol Biol* *15*, 1263-1271.
- 396 Zinani, O.Q.H., Keseroglu, K., and Ozbudak, E.M. (2022). Regulatory mechanisms ensuring  
397 coordinated expression of functionally related genes. *Trends Genet* *38*, 73-81.
- 398
- 399

400 **STAR METHODS**

401 **Key resources table**

| REAGENT or RESOURCE                                             | SOURCE                    | IDENTIFIER |
|-----------------------------------------------------------------|---------------------------|------------|
| <b>Cell lines</b>                                               |                           |            |
| mESC E14 type (129/Ola background)                              | (van Mierlo et al., 2019) |            |
| <b>Cell culture reagents / utensils</b>                         |                           |            |
| 6-well Clear TC-treated Multiple Well Plates                    | Costar                    | REF 3516   |
| Gelatin                                                         | Sigma-Aldrich             | 48723/500g |
| Dulbecco's Modified Eagle Media, high glucose, pyruvate (Gibco) | Fisher Scientific         | #11594486  |
| Beta-mercaptoethanol                                            | Fisher Scientific         | #11528926  |
| Sodium pyruvate (Gibco)                                         | Fisher Scientific         | #11530396  |
| Penicillin/Streptomycin (Gibco)                                 | Fisher Scientific         | #15140122  |
| ESGRO recombinant Mouse Leukemia Inhibitory Factor              | Merckmillipore            | ESG1107    |
| Fetal Bovine Serum                                              | Fisher Scientific         | #A3840002  |
| Phosphate-buffered saline (PBS) (Gibco)                         | Fisher Scientific         | #10728775  |
| 0.05% Trypsin-EDTA (Gibco)                                      | Fisher Scientific         | #11500636  |
| DMSO                                                            | Sigma-Aldrich             | D5879-1L   |
| Acridine Orange/Propidium Iodide Stain                          | Logos Biosystems          | F23001     |
| LUNA Cell Counting Slides                                       | Logos Biosystems          | L12001     |
| LUNA-FL Dual Fluorescence Cell Counter                          | Logos Biosystems          | L20001-LG  |
| <b>Deposited data</b>                                           |                           |            |
| Intron-seq FISH mESC                                            | (Shah et al., 2018)       |            |
| Hi-C contact frequencies mESC                                   | (Nora et al., 2017)       |            |
| Half-life mRNA mESC                                             | (Harova et al., 2009)     |            |
| scRNA-seq mESC                                                  | Produced in house         |            |
| <b>Software and algorithms</b>                                  |                           |            |
| Seurat V3                                                       | (Stuart et al., 2019)     |            |

402

403



## 404 RESOURCE AVAILABILITY

405 Further information and requests for resources and reagents should be directed to and will be fulfilled  
406 by the lead contact, M.M.K.H (maike.hansen@ru.nl).

## 407 METHODS DETAILS

### 408 Single-cell RNA sequencing in mESCs

409 mESC-E14 (mESCs) in this study were obtained from Hendrik Marks's group at Radboud University.  
410 mESC were seeded per well in gelatin coated Costar® 6-well Clear TC-treated Multiple Well Plates  
411 (REF 3516), in serum/LIF culture media consisting of Dulbecco's Modified Eagle Media, supplemented  
412 with 0.1mM beta-mercaptoethanol, 1000 U/mL of Penicillin, 0.1 mg/mL of Streptomycin, 1mM of  
413 sodium pyruvate, 1000 U/mL of ESGRO recombinant Mouse Leukemia Inhibitory Factor and 15% of  
414 ES-qualified heat inactivated Fetal Bovine Serum. Cells were grown for 30 hours in a 37°C incubator  
415 with 5% CO<sub>2</sub> atmosphere. Cells were exposed to 0.007% EtOH for the last 6 hours. Cells were then  
416 washed once with PBS and detached with 0.05% trypsin-EDTA for 4 minutes at 37°C. Detached cells  
417 were pelleted and resuspended in 1mL of freezing media consisting of 80% culture media, 10% of extra  
418 heat inactivated FBS and 10% of DMSO. Proper viability of the cells prior to freezing was quantified  
419 with propidium iodide/acridine orange staining in a LUNA-FL Dual Fluorescence Cell Counter. Frozen  
420 cells were delivered to the commercial company Single Cell Discoveries  
421 (<https://www.scdiscoveries.com>) in dry ice. Single cell barcoding was performed in a 10x microfluidic  
422 genomic chip in order to encapsulate individual cells in water droplets in oil, containing cell specific  
423 barcoded beads. Labeled RNA molecules were pooled and subjected to a poly-A specific reverse  
424 transcription. cDNA molecules were linearly amplified using an *in vitro* transcription reaction and the  
425 final sequencing library was obtained through a second step of reverse transcription. 3'-end sequencing  
426 was performed, followed by quality control and genomic mapping. Final read count per gene and per  
427 cell matrices were generated and used in posterior analysis steps.

428

### 429 Calculation of gene-to-gene correlation in scRNAseq data and gene clustering

430 Preprocessing of raw counts was performed with SeuratV3 (Stuart et al., 2019). Genes detected in less  
431 than 5 cells and cells with less than 200 detected genes, less than 24000 total RNA count and cells with  
432 more than 5% mitochondrial RNAs were discarded. Cells were given a score reflecting their cell cycle  
433 stage based on the expression of specific cell cycle markers (Kowalczyk et al., 2015). A normalized  
434 and scaled count matrix was generated by using the SCTransform method (Hafemeister and Satija,  
435 2019) with an offset of  $\theta=100$  (Lause et al., 2021). The scaling method accounted for the total RNA  
436 count per cell and utilized the percent of mitochondrial RNA and the cell cycle scoring as variables to  
437 regress. The scaled count matrix was used to calculate the full correlation matrix using the Pearson or  
438 the Spearman methods. Pairwise gene-to-gene Pearson correlation matrices were clustered using  
439 complete-linkage hierarchical agglomerative clustering.

440

### 441 Gene-to-gene promoter coordination calculation

442 From the intron-seq FISH data (Shah et al., 2018), the status of the promoter was assessed according to  
443 the presence or absence of intronic signal. Promoter ON states are defined by the presence of intronic  
444 signals (i.e., signal  $\geq 1$ ), while OFF states are defined by the lack thereof (i.e., signal = 0). Therefore,  
445 per gene:

$$446 f_{on} = \frac{Count_{signal \geq 1}}{Count_{signal \geq 1} + Count_{signal = 0}} \quad \text{Equation 1}$$

447 For each pair of genes in the dataset, an observed anti-coordination score (O) was defined as the  
448 proportion of cell pairs where the genes show an opposite behavior (ON/OFF or OFF/ON) over the total  
449 number of cell-to-cell comparisons as described in equation 1. The observed anti-coordination scored  
450 was corrected by the chance of these behavior appearing from independently behaving promoters. To  
451 this extent, the proportion of cells in which each gene is ON was defined as its  $f_{on}$ , and the expected  
452 anti-coordination score (E) was calculated as described in equation 2, where  $f_{on_1}$  and  $f_{on_2}$  represent  
453 the ON ratios ( $f_{on}$ ) of each of the two genes included in the calculation. Observed anti-correlation score  
454 was corrected by calculating the percentual fold change of the observed anti-coordination score with  
455 respect to the expected score by chance as described in equation 3, where  $O$  is the observed anti-  
456 coordination score and  $E$  is the expected anti-coordination score. In order to present this data in a more  
457 intuitive way, we transformed the corrected anti-coordination score in a coordination score as described  
458 in equation 5.

$$459 \quad O = (Count_{ON/OFF} + Count_{OFF/ON}) / (Count_{ON/ON} + Count_{ON/OFF} + Count_{OFF/ON} + Count_{OFF/OFF}) \quad \text{Equation 2}$$

$$460 \quad E = f_{on_1}(1 - f_{on_2}) + f_{on_2}(1 - f_{on_1}) \quad \text{Equation 3}$$

$$461 \quad \text{Corrected anticoordination score} = \left(\frac{O-E}{E} * 100\right) \quad \text{Equation 4}$$

$$462 \quad \text{Corrected coordination score} = -1 * \text{Corrected anticoordination score} \quad \text{Equation 5}$$

463

#### 464 **Estimation of the relationship between promoter toggling rates**

465 The effective ratio between  $K_{on}$  and  $K_{off}$  is calculated from the  $f_{on}$  quantification (Equation 1) where:

$$466 \quad f_{on} = \left(\frac{K_{on}}{K_{on} + K_{off}}\right) \quad \text{Equation 6}$$

467 And the average  $f_{on} = 0.125$ . Therefore,

$$468 \quad 0.125 = \left(\frac{K_{on}}{K_{on} + K_{off}}\right)$$

469 and,

$$470 \quad K_{on} + K_{off} = 8 * K_{on}$$

$$471 \quad K_{off} = 7 * K_{on} \quad \text{Equation 7}$$

472

#### 473 **Calculation of gene expression mean and noise from scRNA-seq dataset**

474 Single gene mean and noise values were obtained through the analysis of the raw read count matrix  
475 with SeuratV3 (Stuart et al., 2019). Next, genes detected in less than 5 cells and cells with less than 200  
476 detected genes, less than 24000 total RNA count and cells with more than 5% mitochondrial RNAs  
477 were discarded. Cells were given a score reflecting their cell cycle stage based on the expression of  
478 specific cell cycle markers (Kowalczyk et al., 2015). Mean gene expression values and residual variance  
479 values ( $\sigma^2_{res}$ ) were calculated using the SCTransform method with an offset value of  $\theta=100$ , using the  
480 percent of mitochondrial RNA and the cell cycle score as variables to regress. In short, biological noise  
481 is obtained through the fitting of the read counts to a negative binomial distribution modeling technical  
482 noise and obtaining the residual variance not explained by the model of technical noise (Hafemeister  
483 and Satija, 2019). These residual variance values ( $\sigma^2_{res}$ ) are comparable to the Fano factor (Lause et al.,  
484 2021). Mean gene expression was then calculated as the  $\log_2(\mu)$  denoted as  $\mu_{\log_2}$ .

485

## 486 **Rolling averages and analysis of correlation for gene expression parameters**

### 487 *Subsampling*

488 For the four sampling regimes, we randomly sub-sampled 10000 sets of 30 by 30 genes (sampling  
489 regimes II, III and IV) or 3 by 3 genes (sampling regime I), within each defined region. Sampling regime  
490 I is a much smaller region so we scaled down the subsampling accordingly.

### 491 *Rolling averages*

492 Genes were sorted according to the matrix resulting from the clustering of the pairwise scRNA-seq  
493 Pearson's coefficients. Starting from the first ranked gene, groups of successive 30 genes were made in  
494 an iterative fashion moving 1 position forward in the gene list with each iteration. For each group of 30  
495 genes the average of  $fon$ ,  $\mu_{log2}$ ,  $\sigma^2_{std}$  and  $t_{1/2}$  was obtained. This process generated four sequential vectors  
496 of averages in which each position corresponded to the same group of genes from the scRNA-seq  
497 clustering order.

### 498 *Correlation for gene expression parameters.*

499 To analyze the correlation between the kinetic parameters ( $fon$  and  $t_{1/2}$ ) and the gene expression output  
500 parameters ( $\mu_{log2}$  and  $\sigma^2_{std}$ ), Pearson coefficients as well as the 95% confidence intervals for the Pearson  
501 coefficients were calculated between the corresponding pairwise values for each parameter in the  
502 previously calculated rolling mean vectors. In order to classify gene groups in different regimes, they  
503 were grouped in bins according to their  $\mu_{log2}$  average value by using a rolling threshold for this value.

504

## 505 **Binned analysis of correlations between differences in kinetic parameters**

506 Two random groups of 30 or 3 contiguous genes in the clustered scRNAseq r matrix were selected in  
507 order to form a 30x30 or 3x3 comparative space. Restrictions in the selection of gene groups were  
508 applied in order to create the 4 sampling regions described previously. For each selected space, the  
509 average r coefficient was calculated. By matrix symmetry the average promoter coordinated behavior  
510 for the corresponding group of genes was obtained from the processed intron-seqFISH data and the  
511 average Hi-C contact frequency was obtained with the same method from the Hi-C data. The average  
512 difference in mean, noise, ON ratio and half-life (i.e.,  $\mu_{log2}$ ,  $\sigma^2_{std}$ ,  $fon$ , and  $t_{1/2}$ ) was obtained by averaging  
513 these parameters for each of the two groups in the comparison and obtaining the directional or absolute  
514 difference as described in equations 8 and 9 respectively.

515

$$516 \text{ directional difference} = \log_2 \left( \frac{\langle \cdot \rangle_{group 1}}{\langle \cdot \rangle_{group 2}} \right) \quad \text{Equation 8}$$

$$517 \text{ absolute difference} = |\text{directional difference}| \quad \text{Equation 9}$$

518 **FIGURE LEGENDS**

519 **Figure 1: mRNA co-expression is not explained by promoter behavior.**

520 **(A-B)** Top: Combined matrix showing clustered pairwise scRNA-seq Pearson's  $r$  coefficients (bottom  
521 half) and corresponding promoter (anti-)coordination scores (top). Red is positive Pearson's  $r$  and blue  
522 is negative Pearson's  $r$ . Green is more coordination and purple is more anti-coordination of promoters  
523 compared to what is expected from random promoter behavior. Bottom: Rolling averages for ON-ratio  
524 ( $f_{on}$ ), relative mean mRNA expression ( $\mu_{\log 2}$ ), noise ( $\sim$ Fano factor,  $\sigma_{res}^2$ ), and mRNA half-life ( $t_{1/2}$ , hours)  
525 ranked in the same order as the clustered matrix, with the background color representing the respective  
526 values.

527 **(C)** Four sampling regimes (I-IV) corresponding to decreasing average co-expression (i.e., scRNA-seq  
528 Pearson's  $r$ ) from left to right.

529 **(D-E)** mRNA co-expression (i.e., scRNAseq Pearson's  $r$  coefficient) versus average (anti-)coordination  
530 of pairwise promoters for regimes I, II, III and IV. **(D)** Color (blue to red) represent the average  
531 scRNAseq Pearson  $r$  coefficient. **(E)** Correlation between mRNA co-expression and promoter  
532 coordination, with linear regression line plotted in yellow and the background color corresponding to  
533 Pearson's  $r$  correlation coefficient as a proxy for relationship strength.

534 **Figure 2: Differences in mRNA half-lives are most strongly associated with mRNA co-expression.**

535 **(A)** Quantification (Pearson's  $r$  coefficient) of association between promoter ON ratio ( $f_{on}$ ) and relative  
536 mean mRNA expression ( $\mu_{\log_2}$ ) calculated by imposing specific expression mean thresholds. Color bar  
537 represents the average promoter ON ratio ( $f_{on}$ ) for genes in each corresponding bin (error bar is 95%  
538 confidence interval).

539 **(B)** Quantification (Pearson's  $r$  coefficient) of association between transcript half-life ( $t_{1/2}$ ) and mean  
540 mRNA expression ( $\mu_{\log_2}$ ) calculated by imposing specific expression mean thresholds. Color bar  
541 represents the average transcript half-life ( $t_{1/2}$ ) for genes in each corresponding bin (error bar is 95%  
542 confidence interval).

543 **(C-D)** Scatter plot (left) and correlation (right) between average mRNA co-expression (i.e., scRNAseq  
544 Pearson's  $r$  coefficient) and average difference in transcript half-life (C) or promoter ON ratio (D) for  
545 regime I.

546 **(E-F)** Scatter plot (left) and correlation (right) between average mRNA co-expression (i.e., scRNAseq  
547 Pearson's  $r$  coefficient) and average difference in transcript half-life (E) or promoter ON ratio (F) for  
548 regime II.

549 **(G)** Top: correlation between average absolute difference in transcript half-life and average absolute  
550 difference in promoter ON ratio. Bottom: correlation between average directional difference in  
551 transcript half-life and average directional difference in promoter ON ratio. Sampling region  
552 corresponds to regime I.

553 **(H)** Scatter plot showing correlation between average ON ration and half-lives for genes where  
554  $\log_2(\mu) > 1$ . Dots are colored according to  $\log_2(\mu)$  to compare with Figure S2H.

555 **(I)** Schematic illustrating that sampled region with decreasing average mRNA co-expression behavior  
556 (i.e., regimes I to IV, left to right) show a decreasing correlation between mRNA co-expression and  
557 mRNA half-life.

558 **Figure S1: Gene-to-gene contacts do not explain mRNA co-expression (Related to Figure 1).**

559 **(A)** Schematic illustration of two genes that can exhibit mRNA co-expression by a shared  
560 transcriptional (upstream) kinetic step or a shared post-transcriptional (downstream) kinetic step.

561 **(B)** Scatter plots representing scaled single cell mRNA expression values for pairs of genes where both  
562 Pearson and Spearman correlation coefficients give the same  $r$  values (left), and where Spearman  
563 coefficients are unreliable (right).

564 **(C)** Combined matrix showing clustered gene-to-gene scRNAseq expression Pearson  $r$  coefficients  
565 (bottom half) and corresponding Spearman coefficients (top half).

566 **(D)** Frequency of pairwise promoter interactions that are either more coordinated (green) or more anti-  
567 coordinated (purple) than expected from random promoter behavior. Shaded area represents 90% of  
568 pairwise comparisons.

569 **(E)** Combined matrix showing clustered gene-to-gene scRNAseq expression Pearson's  $r$  coefficients  
570 (bottom half) and corresponding Hi-C contact frequencies (top half).

571 **(F-G)** mRNA co-expression (i.e., scRNAseq Pearson's  $r$  coefficient) versus average Hi-C contact  
572 frequencies for regions I, II, III and IV. **(F)** Color (blue to red) represent the average scRNAseq Pearson  
573  $r$  coefficient. **(G)** Correlation between mRNA co-expression and Hi-C contact frequencies, with linear  
574 regression line plotted in yellow and the background color corresponding to Pearson's  $r$  correlation  
575 coefficient.

576 **Figure S2: Differences in promoter toggling does not associate with mRNA co-expression and**  
577 **shows compensation behavior with mRNA degradation (Related to Figure 2).**

578 **(A)** Schematic illustrating how promoter toggling can be impacted by altering either the switching ON  
579 of a promoter ( $K_{on}$ ) or the switching OFF of a promoter ( $K_{off}$ ).

580 **(B)** Quantification (Pearson's r coefficient) of association between promoter toggling ( $f_{on}$ ) and relative  
581 mRNA noise (Fano,  $\mu_{\log_2}$ ) calculated by imposing specific expression mean thresholds. Color bar  
582 represents the average promoter toggling ( $f_{on}$ ) for genes in each corresponding bin (error bar is 95%  
583 confidence interval).

584 **(C-D)** Scatter plot (left) and correlation (right) between average mRNA co-expression (i.e., scRNAseq  
585 Pearson's r coefficient) and average difference in transcript half-life (C) or promoter ON ratio (D) for  
586 regime III.

587 **(E-F)** Scatter plot (left) and correlation (right) between average mRNA co-expression (i.e., scRNAseq  
588 Pearson's r coefficient) and average difference in transcript half-life (E) or promoter ON ratio (F) for  
589 regime IV.

590 **(G)** Top: correlation between average absolute difference in transcript half-life and average absolute  
591 difference in promoter ON ratio. Bottom: correlation between average directional difference in  
592 transcript half-life and average directional difference in promoter ON ratio. Sampling region  
593 corresponds to regime II-IV from left to right.

594 **(H)** Scatter plot showing correlation between average ON ration and half-lives per gene. Dots colored  
595 according to  $\log_2(\mu)$  (left) or noise (right). Inset: Scatter plot showing correlation between average ON  
596 ration and half-lives for genes where  $\log_2(\mu) > 1$ . Dots colored according to noise.

**Figure 1.**

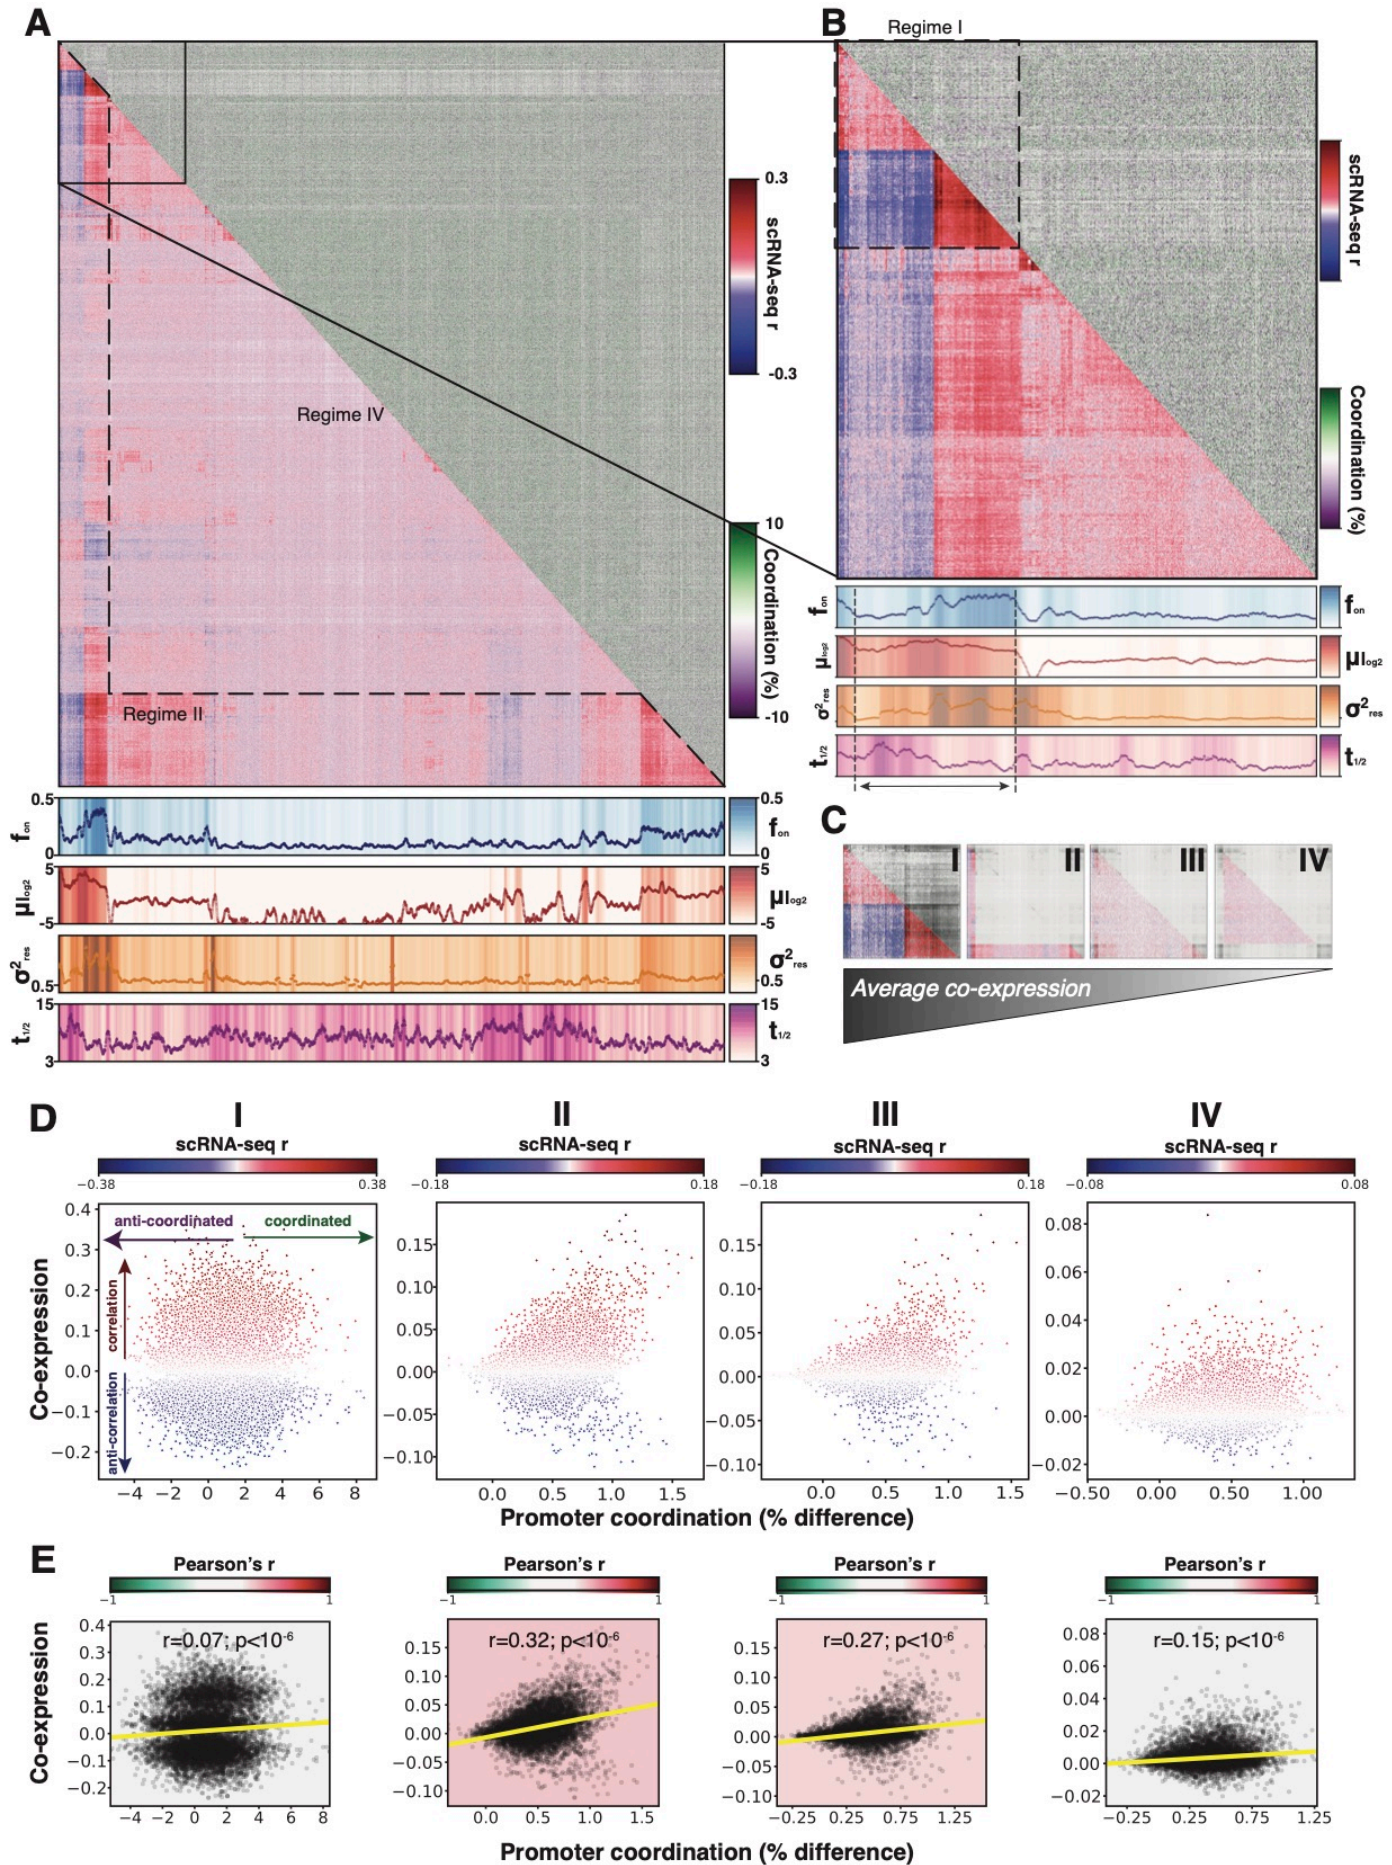



**Figure 2.**

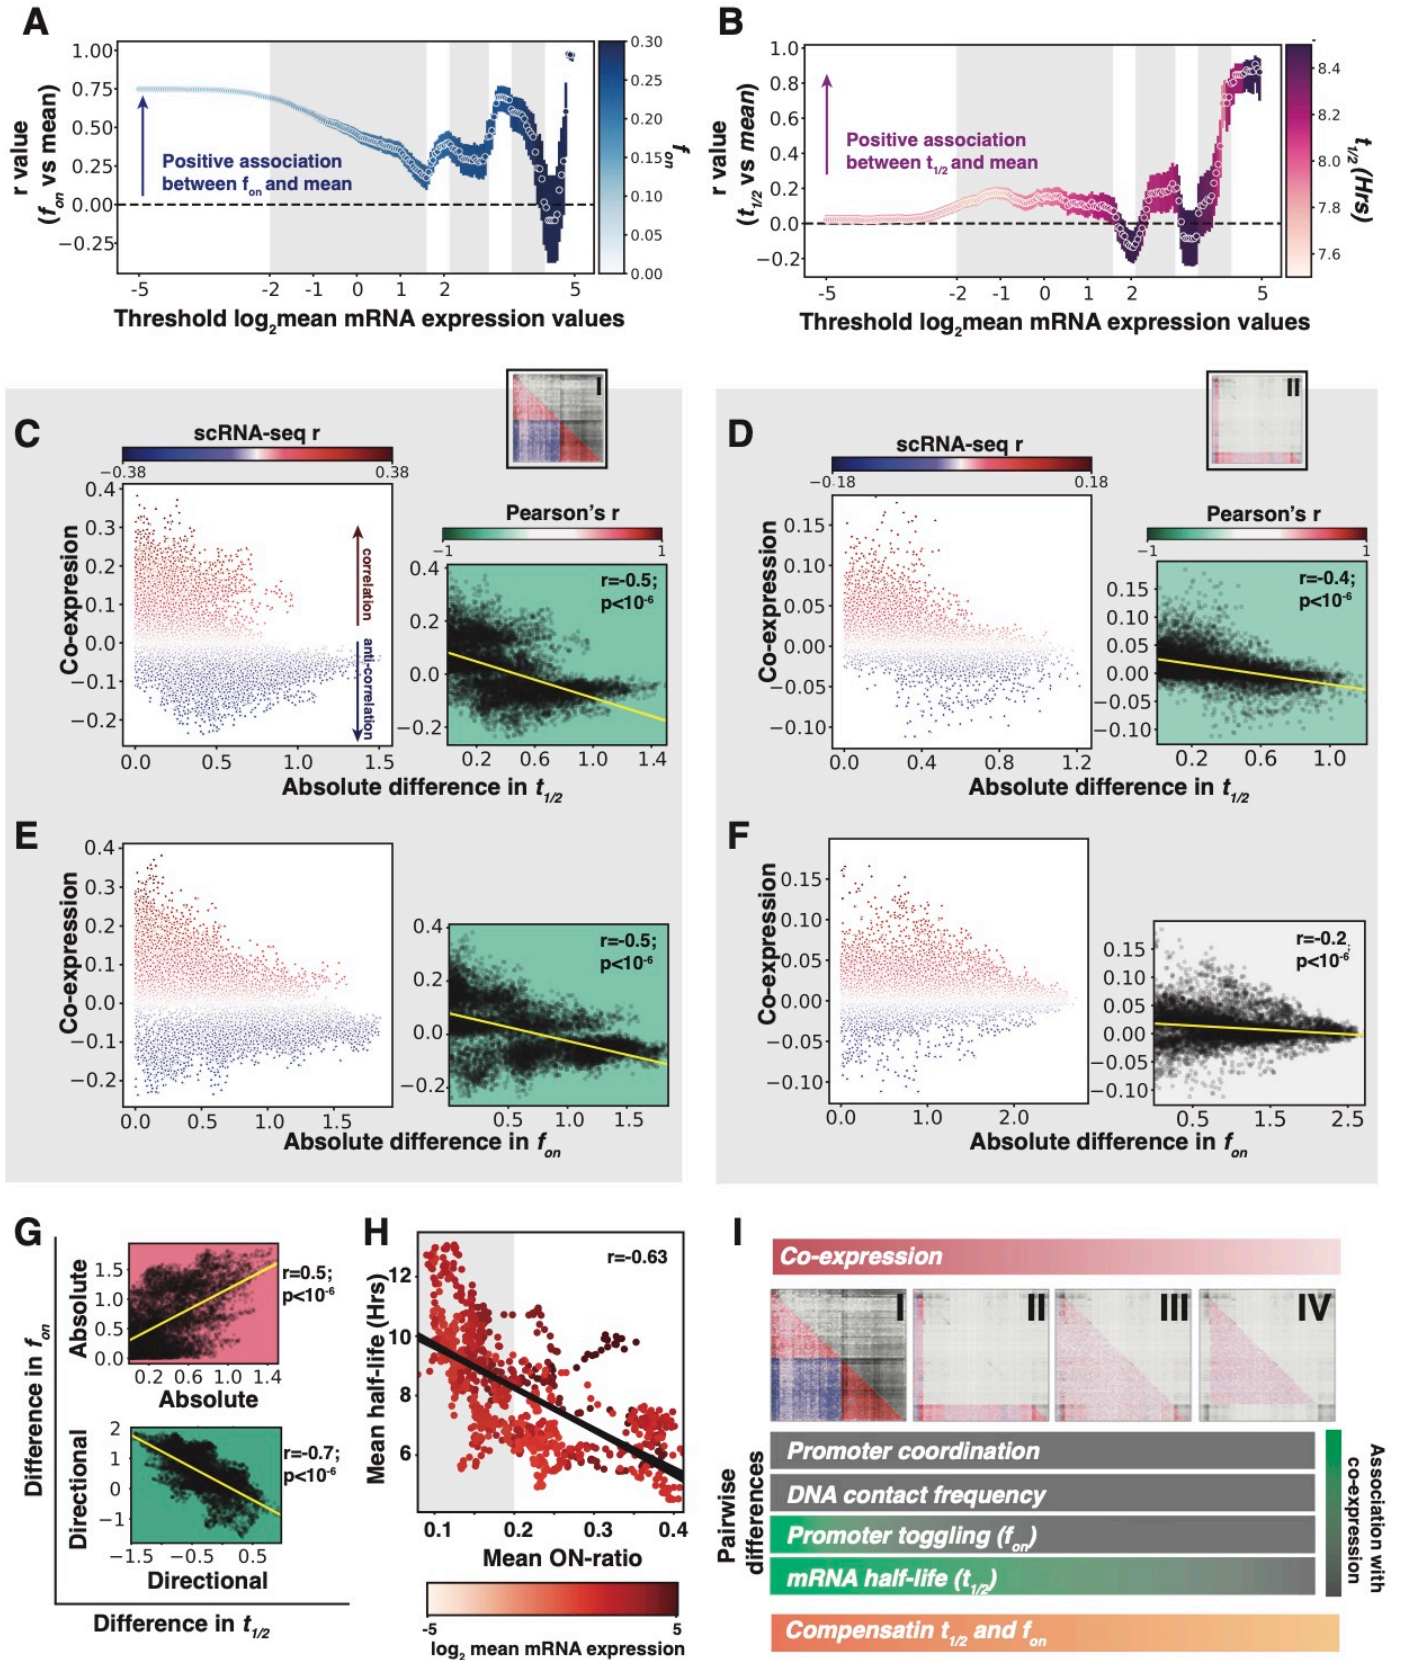

**Figure S1.**

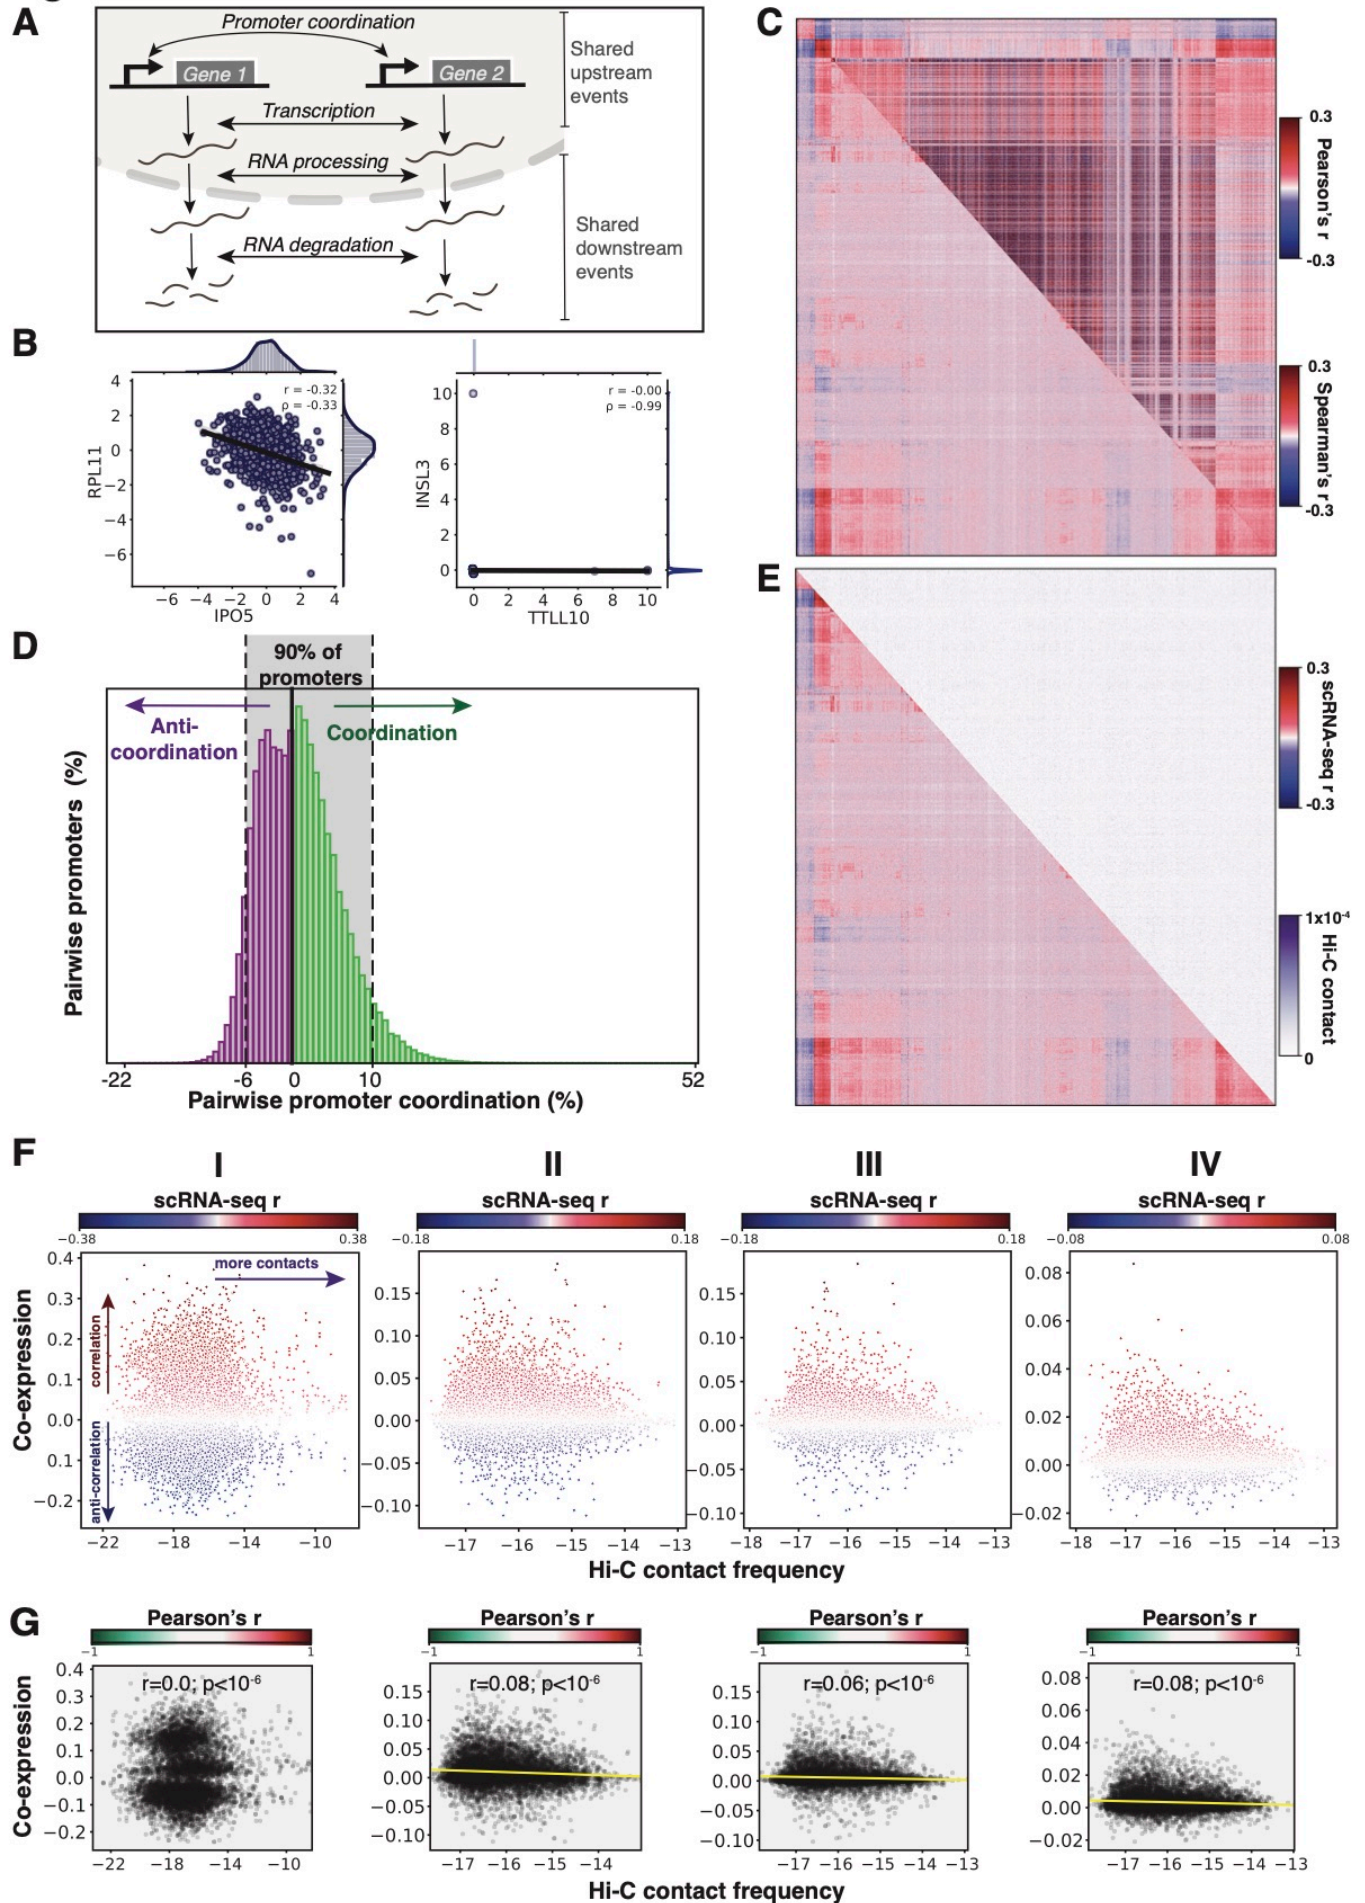

## Figure S2.

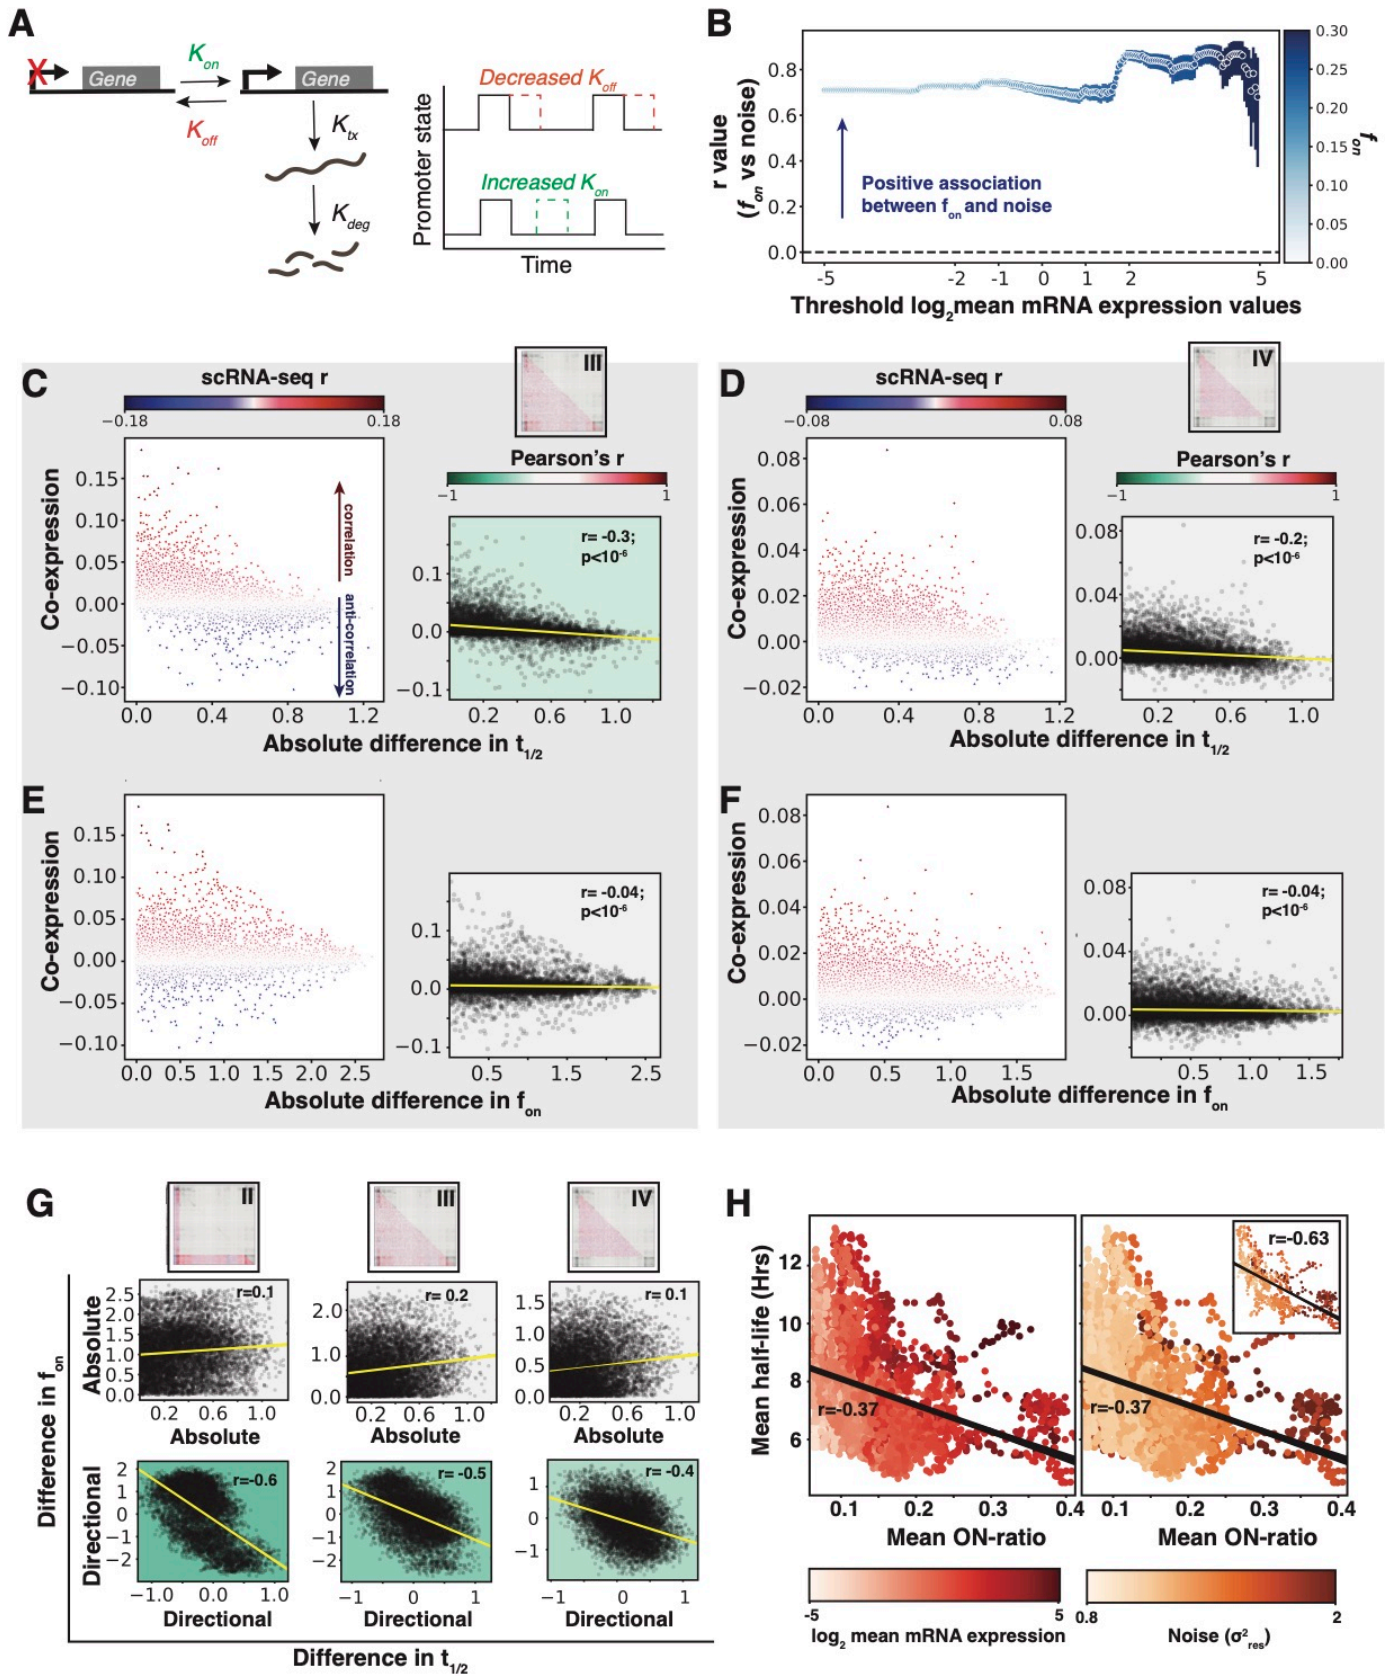

Source: https://www.biorxiv.org/content/10.1101/2022.09.21.508820v1.full.pdf
